# Supplementary material
Source: PubMed Central journal article supplement (PMC3298144)
Supplement: supp_78.6.1917_AEM7212-11_FigS1.pdf [file supp_78.6.1917_AEM7212-11_FigS1.pdf]

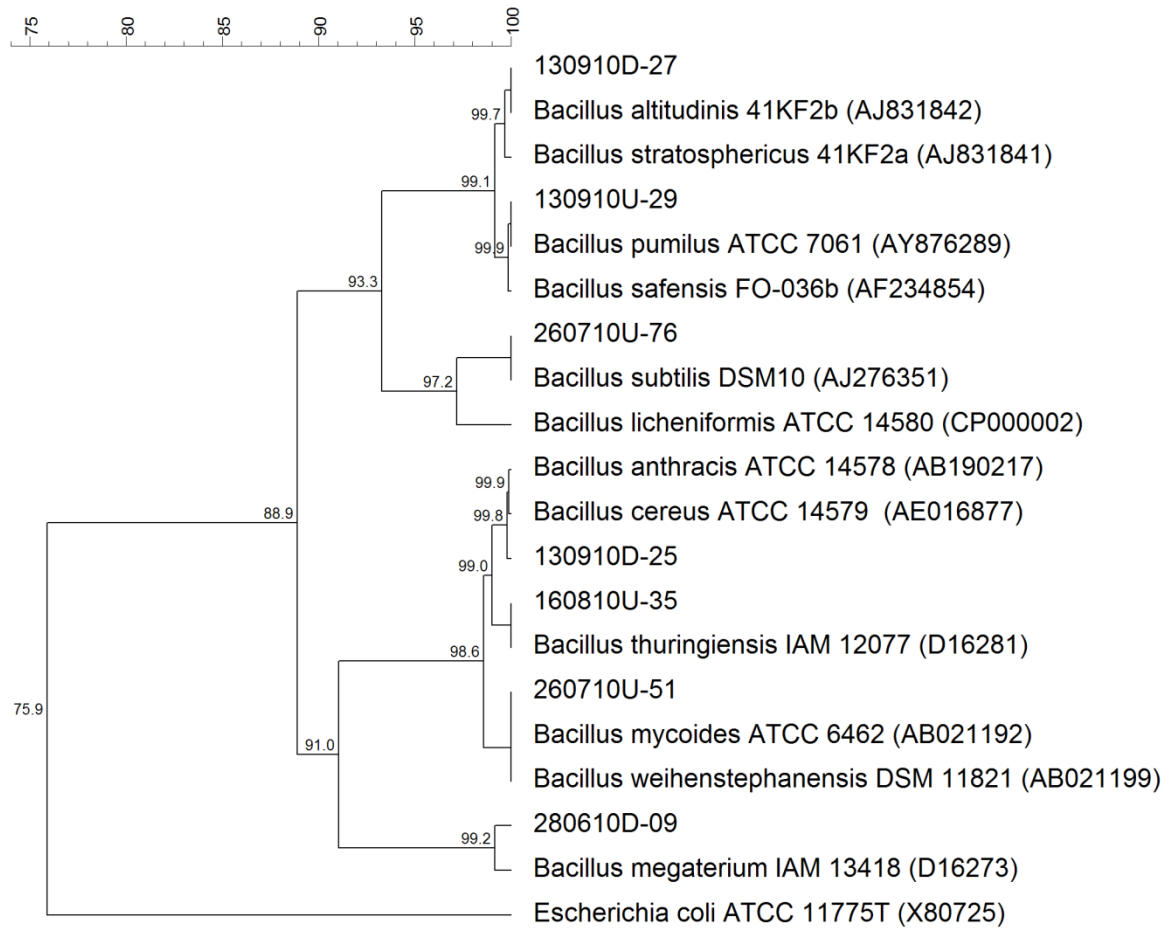

FIG S1. The phylogenetic relationship between the hemolytic *Bacillus* spp. isolates that were sequenced in this study (partial 16SrDNA) and type strains of several closely-related *Bacillus* spp. (RDP-derived 16SrDNA sequences). The obtained hemolytic *Bacillus* spp. isolates clustered into three distinct groups, the “*B. pumilus* group”, the “*B. subtilis* group” and the “*B. cereus* group”. The type strain of *B. megaterium* (RDP-derived 16SrDNA sequence) and a closely related non-hemolytic isolate obtained in this study (partial 16SrDNA) were included in the analysis. The type strain of *E. coli* was included as an out-group (RDP-derived 16SrDNA sequence).
